# Supplementary material for: Generation of bispecific antibodies by structure-guided redesign of IgG constant regions
Source: PubMed Central journal article supplement (PMC9871890; doi:10.3389/fimmu.2022.1063002), 2023-01-10
Supplement: DataSheet_1.pdf [file DataSheet_1.pdf]

## *Supplementary Material*

### **Generation of Bispecific Antibodies by Structure-Guided Redesign of IgG Constant Regions**

**Yordkhwan W. Iwasaki<sup>1,†</sup>, Kannan Tharakaraman<sup>2,†</sup>, Vidya Subramanian<sup>2,†</sup>, Amnart Khongmanee<sup>3</sup>, Andrew Hatas<sup>2</sup>, Eduardo Fleischer<sup>2</sup>, Troy T. Rurak<sup>2</sup>, Patchara Ngok-ngam<sup>3</sup>, Phanthakarn Tit-oon<sup>3</sup>, Mathuros Ruchirawat<sup>3,4</sup>, Jutamaad Satayavivad<sup>1,4,5</sup>, Mayuree Fuangthong<sup>3,4,6,\*</sup>, and Ram Sasisekharan<sup>2,7,\*</sup>**

<sup>1</sup>Program in Environmental Toxicology, Chulabhorn Graduate Institute, Bangkok, Thailand

<sup>2</sup>Koch Institute for Integrative Cancer Research, Massachusetts Institute of Technology, Cambridge, MA, USA

<sup>3</sup>Translational Research Unit, Chulabhorn Research Institute, Bangkok, Thailand

<sup>4</sup>Center of Excellence on Environmental Health and Toxicology (EHT), OPS, MHESI, Thailand

<sup>5</sup>Laboratory of Pharmacology, Chulabhorn Research Institute, Bangkok, Thailand

<sup>6</sup>Program in Applied Biological Sciences, Chulabhorn Graduate Institute, Bangkok, Thailand

<sup>7</sup>Department of Biological Engineering, Massachusetts Institute of Technology, Cambridge, MA, USA

<sup>†</sup>These authors have contributed equally to this work and share first authorship

**\* Correspondence:**

Mayuree Fuangthong, Ram Sasisekharan

mayuree@cri.or.th, rams@mit.edu

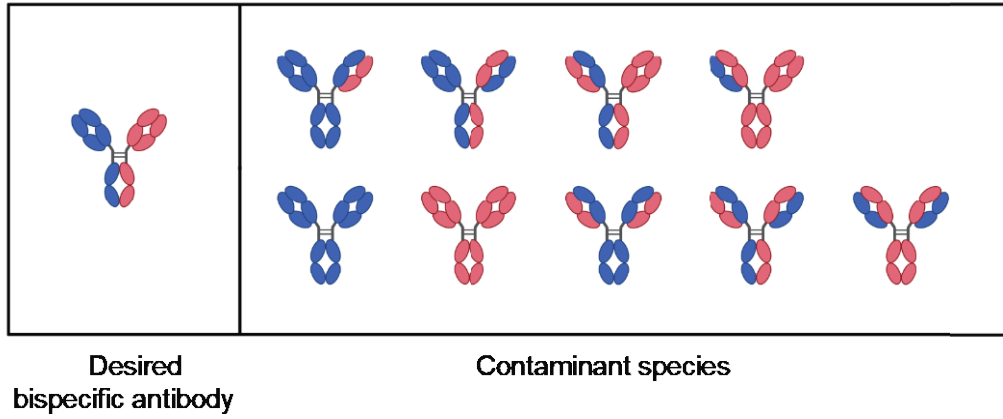

Figure S1. Byproducts of co-expressing 2 heavy, 2 light chains of IgG.

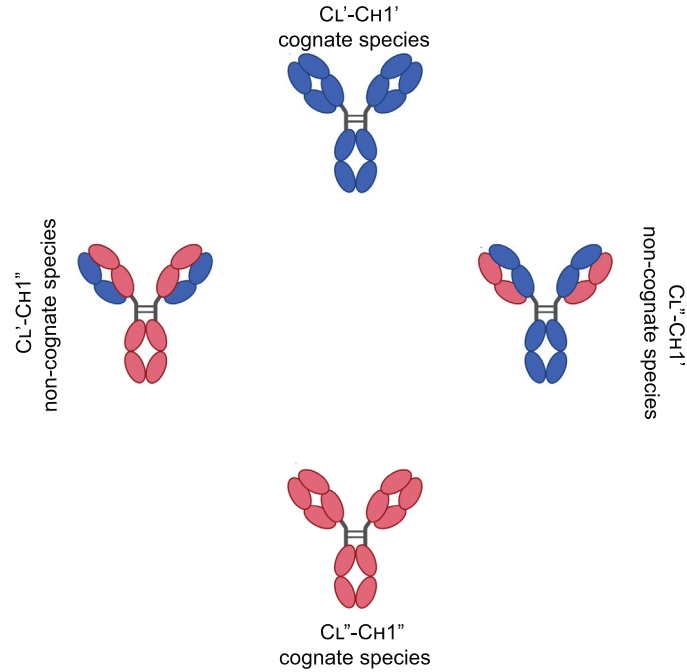

**Figure S2. IgGs that were recombinantly expressed and quantified (by IgG ELISA) during the screening process to identify CH1 & CL interface mutations.** CH1'-CL' and CH1''-CL'' represent the cognate chain pairings (top and bottom species) whereas CH1'-CL'' and CH1''-CL' represent the non-cognate chain pairings (left and right species). Promising mutations favor the expression of matched or cognate IgG species and antagonize the formation of mispaired or non-cognate IgG species.

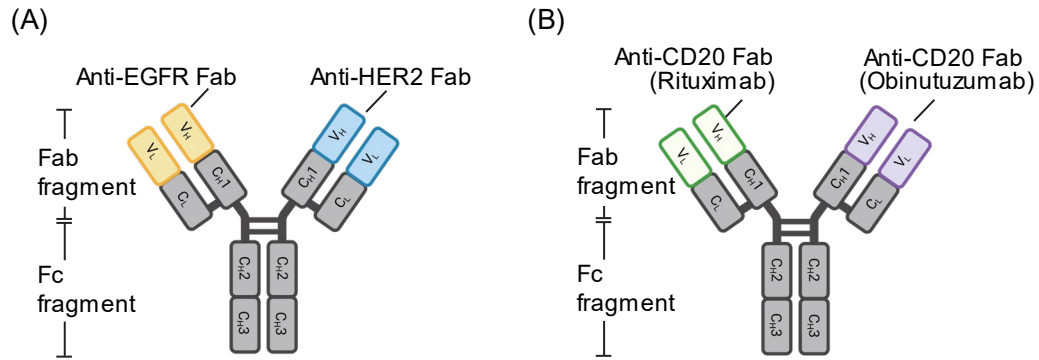

**Figure S3. Schematic diagram of the two BsAbs.** (A) The anti-EGFR/HER2 BsAb contains variable regions specific to EGFR and HER2. Anti-EGFR variable regions were designed based on DL11 mAb, the anti-HER2 variable regions were designed based on pertuzumab mAb. (B) The anti-CD20/CD20 BsAb contains variable regions specific to CD20. The anti-CD20 variable regions were designed based on rituximab, which is a type I anti-CD20 monoclonal antibody and obinutuzumab, which is a type II anti-CD20 monoclonal antibody. The constant regions are based on human IgG1 $\kappa$  isotype.

## Structure-guided design of bispecific antibody

|              | 133                                                                                                                                          | 150-152    | 173        |
|--------------|----------------------------------------------------------------------------------------------------------------------------------------------|------------|------------|
| H-GAMMA-4    | ASTKGPSVFP <b>L</b> APCSRSTSESTAALG <b>C</b> L <b>V</b> KDYFPEPVTVSWNSGALTS <b>G</b> V <b>H</b> TFPAVLQSS                                    |            |            |
| H-GAMMA-1    | ASTKGPSVFP <b>L</b> APSSKSTSGGTAALG <b>C</b> L <b>V</b> KDYFPEPVTVSWNSGALTS <b>G</b> V <b>H</b> TFPAVLQSS                                    |            |            |
|              | <b>188</b>                                                                                                                                   |            |            |
| H-GAMMA-4    | GLYSL <b>S</b> SVVTVPSSSLG <b>T</b> KTYTCNV <b>D</b> HKPSNTK <b>V</b> DKR <b>V</b> ESKY-GPP--CPSCPAPE <b>F</b> LGG                           |            |            |
| H-GAMMA-1    | GLYSL <b>S</b> SVVTVPSSSLG <b>T</b> QTYICNV <b>N</b> HKPSNTK <b>V</b> DK <b>K</b> VE <b>P</b> KSCDK <b>T</b> HTC <b>P</b> PCPA <b>E</b> LLGG |            |            |
| H-GAMMA-4    | PSVFLFPPK <b>P</b> KDTLMISRTPEVTCVVVDV <b>S</b> QEDPEVQFNWYVDGVEV <b>H</b> NA <b>K</b> TK <b>P</b> REEQFN                                    |            |            |
| H-GAMMA-1    | PSVFLFPPK <b>P</b> KDTLMISRTPEVTCVVVDV <b>S</b> HEDPEVKFNWYVDGVEV <b>H</b> NA <b>K</b> TK <b>P</b> REEQ <b>Y</b> N                           |            | <b>357</b> |
| H-GAMMA-4    | STYRVVSVLTVLHQDWLNGKEYKCKVSNKGLPSSIEKTISKAKGQPREPQVYTLPPS <b>Q</b> <b>E</b>                                                                  |            |            |
| H-GAMMA-1    | STYRVVSVLTVLHQDWLNGKEYKCKVSNKALPAPIEK <b>T</b> ISKAKGQPREPQVYTLPPS <b>R</b> <b>D</b> <b>E</b>                                                |            |            |
|              | <b>370</b>                                                                                                                                   |            | <b>409</b> |
| H-GAMMA-4    | MTKNQVSLTCL <b>V</b> KGFYPSDIAVEWESNGQPENNYKTTPPVLDSDGSFFLY <b>S</b> <b>R</b> LTVDKSRW                                                       |            |            |
| H-GAMMA-1    | LTKNQVSLTCL <b>V</b> KGFYPSDIAVEWESNGQPENNYKTTPPVLDSDGSFFLY <b>S</b> <b>K</b> LTVDKSRW                                                       |            |            |
| H-GAMMA-4    | QEGNVFSCSV <b>M</b> HEALHNHYTQKSLSL <b>S</b> LGK                                                                                             |            |            |
| H-GAMMA-1    | QQGNVFSCSV <b>M</b> HEALHNHYTQKSLSL <b>S</b> PGK                                                                                             |            |            |
|              | <b>123</b>                                                                                                                                   | <b>136</b> |            |
| L-KAPPA-IGG4 | RTVAAPSVFIFPPSDE <b>Q</b> LKSGTASVV <b>C</b> LL <b>N</b> NFY <b>P</b> REAKVQWKVDNALQSGNSQESVTEQD                                             |            |            |
| L-KAPPA-IGG1 | RTVAAPSVFIFPPSDE <b>Q</b> LKSGTASVV <b>C</b> LL <b>N</b> NFY <b>P</b> REAKVQWKVDNALQSGNSQESVTEQD                                             |            |            |
|              | <b>177</b>                                                                                                                                   |            |            |
| L-KAPPA-IGG4 | SKDSTYLS <b>S</b> <b>T</b> LTLSKADY <b>E</b> KHKVYACEVTHQGLSSPVTK <b>S</b> FN <b>R</b> G <b>E</b> C                                          |            |            |
| L-KAPPA-IGG1 | SKDSTYLS <b>S</b> <b>T</b> LTLSKADY <b>E</b> KHKVYACEVTHQGLSSPVTK <b>S</b> FN <b>R</b> G <b>E</b> C                                          |            |            |

**Figure S4. Conservation of heavy chain constant region mutations in IgG4 isotype.** Residues modified for bispecific assembly are highlighted in red. The constant region of the light chain is conserved between IgG1 and IgG4. All the positions modified are conserved between the isotypes except 409, which is already a Arg in IgG4.

**Table S1. Fc mutations involved in bispecific platforms.**

| HC1                                             | HC2                                             | Type                                                               | Source                                                                     |
|-------------------------------------------------|-------------------------------------------------|--------------------------------------------------------------------|----------------------------------------------------------------------------|
| Y349C, T366S, L368A, Y407V                      | S354C, T366W                                    | Knobs into Holes + S-S stabilization SAV-W                         | Genentech (Merchant AM et al., Nat Biotechnol. 1998; PMID: 9661204)        |
| E356K, E357K, D399K                             | K370E, K409D, K439E                             | Ionic, electrostatic                                               | Chugai (WO2006106905)                                                      |
| K392D, K409D                                    | E356K, D399K                                    | Ionic, electrostatic DD-KK                                         | Amgen (Gunasekaran K et al., J Biol Chem. 2010; PMID: 20400508)            |
| S364H, F405A                                    | Y349T, T394F                                    | Mixed HA-TF                                                        | Xencor, Inc. (Moore GL et al., MAbs 2011; PMID: 22123055)                  |
| Fusion of leucine zipper A to C-terminus of CH3 | Fusion of leucine zipper A to C-terminus of CH3 | LUZ-Y                                                              | Max-Planck-Institute (Wranik BJ et al., J Biol Chem. 2012; PMID: 23118228) |
| IgG CH3                                         | IgA CH3                                         | SEEDbody                                                           | EMD Serono (Davis JH et al., Protein Eng Des Sel. 2010; PMID: 20299542)    |
| F405L                                           | K409R                                           | Fab-arm exchange or DuoBody                                        | Genmab (Labrijn AF et al., PNAS 2013; PMID: 23479652)                      |
| E345R, Q347R, T366V, K409V                      | K360D, D399M, Y407A                             | Hydrophobic/steric complementarity + electrostatic complementarity | Leaver-Fay A et al., Structure. 2016; PMID: 26996964                       |
| Y349S, K370Y, T366M, K409V                      | E356G, E357D, S364Q, Y407A                      | Negative-state repertoire                                          | Leaver-Fay A et al., Structure. 2016; PMID: 26996964                       |
| T350V/L351Y/F405A/Y407V                         | T350V/T366L/K392L/T394W                         | Hydrophobic/steric complementarity                                 | Zymeworks (Kreudenstein TSV et al., MAbs 2013; PMID: 23924797)             |
| K370E                                           | E357K, K409R                                    | Inter-residue network                                              | This study                                                                 |

**Table S2. Fab mutations involved in bispecific platforms.**

| Heavy and light chain mutations                                                                                                                                                                      | Format                                     | Remarks                                        | Type                                              | Source                                                             |
|------------------------------------------------------------------------------------------------------------------------------------------------------------------------------------------------------|--------------------------------------------|------------------------------------------------|---------------------------------------------------|--------------------------------------------------------------------|
| Q39, Q105 and S183 in heavy chain and Q38, A43 and S176 in light chain                                                                                                                               | 4-chain Ig-like                            | Mutations in V <sub>H</sub> /V <sub>L</sub>    | Electrostatic steering                            | Amgen (US9822173B2)                                                |
| V37F and L45W in heavy chain and Y87A and F98M in light chain                                                                                                                                        | V <sub>H</sub> -V <sub>L</sub> heterodimer | Mutations in V <sub>H</sub> /V <sub>L</sub>    | Hydrophobic/Steric                                | Genentech (Zhu Z et al., Protein Sci. 1997; PMID: 9098887)         |
| Q39E/K in heavy chain and Q38K/E in light chain                                                                                                                                                      | Single chain diabody                       | Mutations in V <sub>H</sub> /V <sub>L</sub>    | Electrostatic                                     | Chugai (WO2006106905)                                              |
| V37, Q39, W103, F100, A139, L143, D144, K145, D146, F174, P175, Q179, S188 and V190 in heavy chain<br>And Q38, P44, T85, F98, F116, F118, Q124, V133, L135, Q160, S176, T178 and T180 in light chain | 4-chain Ig-like                            | Mutations in V <sub>H</sub> /V <sub>L</sub>    | Unkown                                            | Zymeworks (WO2015181805)                                           |
| Q39K/Y, R62E, H172A, F174G, V190 in heavy chain and D1R, Q38D/R, L135Y, S176W in light chain                                                                                                         | 4-chain Ig-like                            | Mutations in V <sub>H</sub> /V <sub>L</sub>    | Steric/Charge                                     | Eli Lilly (Lewis SM et. al., Nat Biotechnol. 2014; PMID: 24463572) |
| 39K and TCRCa in heavy chain and 38D and TCR Cb in light chain                                                                                                                                       | 4-chain Ig-like                            | Mutations in V <sub>H</sub> /V <sub>L</sub>    | IgG/TCR chimeras for specific pairing             | Eli Lilly (Wu X et al., MAbs 2015; PMID: 25611120)                 |
| T192E, L143Q, S188V in heavy chain and N137K, S114A, V133T and S176V in light chain                                                                                                                  | Tetravalent                                | No mutations in V <sub>H</sub> /V <sub>L</sub> | Charged residues and hydrophobicity-polarity-swap | Golay J et al. J Immunol. 2016; PMID: 26921308                     |
| No mutations                                                                                                                                                                                         | 4-chain Ig-like                            | NA                                             | Doman crossover (CrossMab)                        | Schaefer W et al., PNAS 2011; PMID: 21690412                       |
| A20L, K26D in heavy chain and F7S/A/V, T18R in light chain                                                                                                                                           | 4-chain Ig-like                            | No mutations in V <sub>H</sub> /V <sub>L</sub> | Predictions were made using FoldX                 | Bönisch M et al., Protein Eng Des Sel. 2017; PMID: 28981885        |
| F126C in heavy chain and S121C in light chain                                                                                                                                                        | DuetMab                                    | No mutations in V <sub>H</sub> /V <sub>L</sub> | Engineered disulfide bond                         | Mazor Y et al., MAbs 2015; PMID: 25621507                          |
| L133V, L150A, K152D, H173D, S188W in heavy chain and Q123, N136, T177 in light chain                                                                                                                 | 4-chain Ig-like                            | Kappa-specific                                 | Steric/Charge/Hydrophobic                         | This study                                                         |

Table S3. Interacting pairs of residues across the C<sub>H</sub>1-C<sub>L</sub> interface.

| <b>C<sub>H</sub>1 residue</b> | <b>Interaction</b>      | <b>C<sub>L</sub> residue</b> |
|-------------------------------|-------------------------|------------------------------|
| LEU-133                       | Hydrophobic interaction | PHE-117                      |
| LEU-133                       | Hydrophobic interaction | VAL-132                      |
| ALA-134                       | Hydrophobic interaction | PHE-117                      |
| PRO-135                       | Hydrophobic interaction | PHE-117                      |
| LYS-138                       | Hydrogen bond           | GLU-212                      |
| LYS-138                       | Ionic bond              | GLU-212                      |
| LYS-138                       | Cation-pi interaction   | PHE-208                      |
| ALA-146                       | Hydrophobic interaction | PHE-117                      |
| ALA-146                       | Hydrophobic interaction | PHE-115                      |
| ALA-146                       | Hydrophobic interaction | LEU-134                      |
| LEU-147                       | Hydrophobic interaction | PHE-117                      |
| LEU-150                       | Hydrophobic interaction | VAL-132                      |
| HIS-173                       | Hydrogen bond           | ASN-137                      |
| HIS-173                       | Hydrogen bond           | SER-173                      |
| HIS-173                       | Hydrogen bond           | ASN-136                      |
| HIS-173                       | Ionic bond              | ASP-166                      |
| PHE-175                       | Hydrophobic interaction | VAL-162                      |
| PHE-175                       | Hydrophobic interaction | LEU-174                      |
| PHE-175                       | Hydrophobic interaction | LEU-134                      |
| PRO-176                       | Hydrophobic interaction | VAL-162                      |
| PRO-176                       | Hydrogen bond           | SER-161                      |
| LEU-179                       | Hydrogen bond           | GLN-159                      |
| VAL-190                       | Hydrophobic interaction | LEU-134                      |
| LYS-218                       | Ionic bond              | GLU-122                      |
| LYS-223                       | Hydrogen bond           | CYS-213                      |
| LYS-223                       | Ionic bond              | ASP-121                      |
| CYS-225                       | Disulfide bridge        | CYS-213                      |



**Table S4. SIN scores, BSA and distance from pseudo two-fold axis of C<sub>H</sub>1-C<sub>L</sub> interface residues.**

| <b>Residue</b> | <b>SIN score</b> | <b>Buried Surface Area</b> | <b>Distance from two-fold axis</b> |
|----------------|------------------|----------------------------|------------------------------------|
| H:LEU-133      | 0.275            | 0.939                      | 5.774                              |
| H:ALA-134      | 0.053            | 0.69                       | 9.211                              |
| H:PRO-135      | 0.188            | 0                          | 10.247                             |
| H:LYS-138      | 0.256            | 0.723                      | 8.699                              |
| H:ALA-146      | 0.071            | 1                          | 8.025                              |
| H:LEU-147      | 0.411            | 0.915                      | 7.705                              |
| H:LEU-150      | 0.345            | 0.901                      | 0.822                              |
| H:HIS-173      | 0.275            | 0.773                      | 9.827                              |
| H:PHE-175      | 0.443            | 0.982                      | 8.609                              |
| H:PRO-176      | 0.125            | 0.379                      | 11.092                             |
| H:LEU-179      | 0.221            | 0.101                      | 13.29                              |
| H:VAL-190      | 0.243            | 0.945                      | 6.203                              |
| H:LYS-218      | 0.231            | 0.258                      | 9.364                              |
| H:LYS-223      | 0.178            | 0.6                        | 15.041                             |
| H:CYS-225      | 0.137            | 0.57                       | 16.429                             |
| L:PHE-115      | 0.447            | 0.95                       | 2.808                              |
| L:PHE-117      | 0.432            | 0.996                      | 6.073                              |
| L:ASP-121      | 0.101            | 0.134                      | 13.432                             |
| L:GLU-122      | 0.26             | 0.427                      | 11.584                             |
| L:VAL-132      | 0.27             | 0.962                      | 4.415                              |
| L:LEU-134      | 0.323            | 0.994                      | 1.579                              |
| L:ASN-136      | 0.257            | 0.803                      | 6.504                              |
| L:ASN-137      | 0.158            | 0.266                      | 10.078                             |
| L:GLN-159      | 0.133            | 0.49                       | 11.465                             |
| L:SER-161      | 0.135            | 0.846                      | 9.926                              |
| L:VAL-162      | 0.262            | 0.368                      | 11.35                              |
| L:ASP-166      | 0.175            | 0.209                      | 17.312                             |
| L:SER-173      | 0.207            | 0.991                      | 9.019                              |
| L:LEU-174      | 0.303            | 0.316                      | 7.507                              |
| L:PHE-208      | 0.715            | 0.5                        | 12.454                             |
| L:GLU-212      | 0.162            | 0.15                       | 18.275                             |
| L:CYS-213      | 0.073            | 0.664                      | 16.696                             |

**Table S5. Rational structure-based designs of constant regions.** Expression levels of matched and mismatched antibodies relative to their unmodified versions were computed in percentage form. ‘-’: expression not quantified due to missing heavy or light chain. ND: not determined. Columns 3 & 6 represent % expression levels of correctly paired species whereas columns 8 & 9 represent % expression levels of mispaired species (also refer Fig. S2).

| Cluster | Pertuzumab CORRECT PAIRING |                         |              | DL11 CORRECT PAIRING |                           |                              | MISPAIRING |           |
|---------|----------------------------|-------------------------|--------------|----------------------|---------------------------|------------------------------|------------|-----------|
|         | Pertuzumab                 |                         |              | DL11                 |                           |                              |            |           |
|         | CL'                        | % Expression (CL'-CH1') | CH1'         | CL''                 | % Expression (CL''-CH1'') | CH1''                        | CL''-CH1'  | CL'-CH1'' |
| 1       | WT                         | 100%                    | WT           | 117V, 132D, 134D     | 0%                        | 133Q, 175K, 188N, 190N       | 0%         | 14%       |
| 2       | WT                         | 100%                    | WT           | 117S, 132D, 134D     | 1%                        | 133Q, 175K, 188N, 190N       | 0%         | 14%       |
| 3       | WT                         | 100%                    | WT           | 132D, 134D           | 0%                        | 133Q, 175K, 188N, 190N       | 7%         | 14%       |
| 4       | WT                         | 100%                    | WT           | 134D                 | 0%                        | 133Q, 175K, 188N, 190N       | 63%        | 14%       |
| 5       | WT                         | 100%                    | WT           | 132D                 | 0%                        | 133Q, 175K, 188N, 190N       | 39%        | 14%       |
| 6       | WT                         | 100%                    | WT           | 117S, 132D, 134D     | 0%                        | 133Q, 146Q, 175R, 188N, 190Q | 0%         | 6%        |
| 7       | WT                         | 100%                    | WT           | 117V, 132D, 134D     | 0%                        | 133Q, 146Q, 175R, 188N, 190Q | 0%         | 6%        |
| 8       | WT                         | 100%                    | WT           | 132D, 134D           | 0%                        | 133Q, 146Q, 175R, 188N, 190Q | 7%         | 6%        |
| 9       | WT                         | 100%                    | WT           | 134D                 | 0%                        | 133Q, 146Q, 175R, 188N, 190Q | 63%        | 6%        |
| 10      | WT                         | 100%                    | WT           | 132D                 | 0%                        | 133Q, 146Q, 175R, 188N, 190Q | 39%        | 6%        |
| 11      | WT                         | 100%                    | WT           | 132D, 134D           | 3%                        | 175Y                         | 159%       | ND        |
| 12      | WT                         | 100%                    | WT           | 134D                 | 47%                       | 175Y                         | ND         | ND        |
| 13      | WT                         | 100%                    | WT           | 132D                 | 21%                       | 175Y                         | ND         | ND        |
| 14      | WT                         | 100%                    | WT           | 132D, 134D           | 0%                        | 175Y, 190A                   | 110%       | ND        |
| 15      | WT                         | 100%                    | WT           | 134D                 | 11%                       | 175Y, 190A                   | ND         | ND        |
| 16      | WT                         | 100%                    | WT           | 132D                 | 4%                        | 175Y, 190A                   | ND         | ND        |
| 17      | 177R                       | 64%                     | 150D         | 134D                 | 0%                        | 150Y, 190N                   | 12%        | 0%        |
| 18      | 177R                       | 18%                     | 150D, 190K   | 134D                 | 12%                       | 150Y, 190R                   | 0%         | 9%        |
| 19      | 177R                       | 63%                     | 150D         | 134D                 | 55%                       | WT                           | 10%        | 64%       |
| 20      | 177R                       | 18%                     | 150D, 190K   | 134D                 | 58%                       | 175Y                         | 0%         | 84%       |
| 21      | 177R                       | -                       | Not included | 134D                 | 0%                        | 150Y, 190N                   | -          | 0%        |
| 22      | 177R                       | -                       | Not included | 134D                 | 12%                       | 150Y, 190R                   | -          | 9%        |
| 23      | 159K                       | 109%                    | 180D         | WT                   | 108%                      | 180K                         | 104%       | 62%       |

## Structure-guided design of bispecific antibody

| Cluster | Pertuzumab CORRECT PAIRING |                         |            | DL11 CORRECT PAIRING |                           |                  | MISPAIRING |           |
|---------|----------------------------|-------------------------|------------|----------------------|---------------------------|------------------|------------|-----------|
|         | Pertuzumab                 |                         |            | DL11                 |                           |                  |            |           |
|         | CL'                        | % Expression (CL'-CH1') | CH1'       | CL''                 | % Expression (CL''-CH1'') | CH1''            | CL''-CH1'  | CL'-CH1'' |
| 24      | 123E,159K, 177K            | 127%                    | 180D       | 123K, 159E,177D      | 2%                        | 180K             | 2%         | 132%      |
| 25      | Not included               | -                       | 180D       | 123K, 159E           | 29%                       | 180K             | 95%        | -         |
| 26      | Not included               | -                       | 180D       | 123K                 | 20%                       | 180K             | 98%        | -         |
| 27      | Not included               | -                       | 180D       | 159D                 | 120%                      | 180K             | 104%       | -         |
| 28      | 177K                       | ND                      | 180E       | 166H, 177E           | ND                        | 173D, 180K       | 110%       | 73%       |
| 29      | 177K                       | ND                      | 173K, 180E | 166K, 177E           | ND                        | 173D, 180K       | 99%        | 73%       |
| 30      | WT                         | 100%                    | WT         | 122K, 212K           | 102%                      | 138E, 218E       | 74%        | 106%      |
| 31      | 123D,136D                  | 104%                    | 152H       | 123H, 136H           | 45%                       | 152D, 173D       | 76%        | 37%       |
| 32      | 123D,136D                  | 73%                     | WT         | 123K, 136K           | 84%                       | 152D, 173D       | 47%        | 37%       |
| 33      | 123D,136D                  | 78%                     | WT         | 123K, 136K           | 68%                       | 152D, 173D       | 74%        | 31%       |
| 34      | 159K                       |                         | 180D       | 159D                 | 120%                      | 180K             | 104%       | 62%       |
| 35      | 132F                       | 90%                     | 133V, 150A | 177A                 | 85%                       | 188F             | 41%        | 91%       |
| 36      | 132W                       | 96%                     | 133V, 150A | 177A                 | 85%                       | 188W             | 41%        | 85%       |
| 37      | WT                         | 100%                    | WT         | 134W                 | 11%                       | 146G, 175A, 190G | 60%        | 90%       |
| 38      | WT                         | 100%                    | WT         | 123W                 | 36%                       | 131A, 150A       | 40%        | 140%      |
| 39      | WT                         | 100%                    | WT         | 123W                 | 66%                       | 131A, 150V       | 40%        | 119%      |
| 40      | 123D, 136D                 | 87%                     | 133V, 150A | 123K, 136K, 177A     | 63%                       | 152D, 173D, 188W | 0%         | 48%       |
| 41      | 123D, 136D, 177R           | 62%                     | 150D       | 123K, 136K           | 86%                       | 152D, 173D       | 54%        | 43%       |
| 42      | 177R                       | 52%                     | 150D       | 134D                 | 48%                       | WT               | 10%        | 48%       |
| 43      | 123D, 136D, 177R           | 45%                     | 150D       | 123K, 134D, 136K     | 4%                        | 152D, 173D       | 0%         | 40%       |
| 44      | 123D, 132W, 136D           | 43%                     | 133V, 150A | 123K, 136K, 177A     | 57%                       | 152D, 173D, 188W | 0%         | 23%       |

**Table S6. Rational structure-based designs of both the C<sub>H1</sub>-C<sub>L</sub> mutations – relative expression of cognate heavy-light paired and mispaired IgGs.**

| Mutation Set        | Lot Name | Heavy Chain             | Light Chain             | Expression (µg/mL) | %Correct C <sub>H1</sub> /C <sub>L</sub> | %Incorrect C <sub>H1</sub> /C <sub>L</sub> | Other Description           |
|---------------------|----------|-------------------------|-------------------------|--------------------|------------------------------------------|--------------------------------------------|-----------------------------|
| Pertuzumab/<br>DL11 | AFM5     | Pertuzumab WT           | Pertuzumab WT           | 59.366             | 58.45%                                   | 41.55%                                     | 3-Chain<br>Total H:L<br>1:1 |
|                     |          |                         | DL11 WT                 |                    |                                          |                                            |                             |
|                     | AFL5     | Pertuzumab (133V, 150A) | Pertuzumab (123D, 136D) | 10.23              | 100.00%                                  | 0.00%                                      |                             |
|                     |          |                         | DL11 (123K, 136K, 177A) |                    |                                          |                                            |                             |
|                     | AFM6     |                         | Pertuzumab WT           | 54.127             | 43.75%                                   | 56.25%                                     |                             |
|                     |          | DL11 WT                 | DL11 WT                 |                    |                                          |                                            |                             |
|                     | AFL6     |                         | Pertuzumab (123D, 136D) | 50.151             | 55.05%                                   | 44.95%                                     |                             |
|                     |          | DL11 (152D, 173D, 188W) | DL11 (123K, 136K, 177A) |                    |                                          |                                            |                             |
|                     | AFM7     | Pertuzumab WT           | Pertuzumab WT           | 68.486             | 54.40%                                   | 45.60%                                     |                             |
|                     |          | DL11 WT                 |                         |                    |                                          |                                            |                             |
|                     | AFL7     | Pertuzumab (133V, 150A) | Pertuzumab (123D, 136D) | 42.122             | 48.90%                                   | 51.20%                                     |                             |
|                     |          | DL11 (152D, 173D, 188W) |                         |                    |                                          |                                            |                             |
|                     | AFM8     | Pertuzumab WT           |                         | 56.392             | 48.20%                                   | 51.80%                                     |                             |
|                     |          | DL11 WT                 | DL11 WT                 |                    |                                          |                                            |                             |
|                     | AFL8     | Pertuzumab (133V, 150A) |                         | 6.514              | 100.00%                                  | 0.00%                                      |                             |
|                     |          | DL11 (152D, 173D, 188W) | DL11 (123K, 136K, 177A) |                    |                                          |                                            |                             |

**Table S7. Predicted number of weak and strong binders of MHC II alleles in the WT and modified constant regions.**

|              | WT    |              |                | Mutants                            |              |                |
|--------------|-------|--------------|----------------|------------------------------------|--------------|----------------|
|              | Chain | Weak binders | Strong binders | Chain                              | Weak binders | Strong binders |
| <b>mAb1</b>  | Heavy | 202          | 43             | Heavy - L133V, L150A, E357K, K409R | 199          | 43             |
|              | Light | 74           | 32             | Light - Q123D, N136D               | 73           | 32             |
| <b>mAb2</b>  | Heavy | 202          | 43             | Heavy - K152D, H173D, S188W, K370E | 184          | 35             |
|              | Light | 74           | 32             | Light - Q123K, N136K, T177A        | 83           | 34             |
| <b>Total</b> |       | 552          | 150            |                                    | 539          | 144            |

**Table S8. Amino acid sequencing results of the bispecific antibodies that were used for analytical and functional characterization.** Mutations introduced to form a bispecific assembly are listed and marked in the sequence (in red bold font).

| Bispecific            | Chains                 | Mutations                  | Sequence                                                                                                                                                                                                                                                                                                                                                                                                                                                                                                                                                      |
|-----------------------|------------------------|----------------------------|---------------------------------------------------------------------------------------------------------------------------------------------------------------------------------------------------------------------------------------------------------------------------------------------------------------------------------------------------------------------------------------------------------------------------------------------------------------------------------------------------------------------------------------------------------------|
| Anti-HER2 X HER1/HER3 | Pertuzumab-Heavy Chain | L133V, L150A, E357K, K409R | EVQLVESGGGLVQPGGSLRLSCAASGFTFTDY<br>TMDWVRQAPGKGLEWVADVNPNSGGSIYNQRF<br>KGRFTLSVDRSKNTLYLQMNSLRAEDTAVYYC<br>ARNLGPSFYFDYWGGQTLVTVSSASTKGPSVF<br>P <b>V</b> APSSKSTSGGTAALGC <b>A</b> VKDYFPEPVTVSW<br>NSGALTSGVHTFPAVLQSSGLYSLSSVTVPS<br>SSLGTQTYICNVNHKPSNTKVDKKEPKSCDK<br>THTCPPCPAPELLGGPSVFLFPPKPKDTLMIS<br>RTPEVTCVVVDVSHEDPEVKFNWYVDGVEVHN<br>AKTKPREEQYNSTYRVVSVLTVLHQDWLNGKE<br>YKCKVSNKALPAPIEKTISKAKGQPREPQVY<br>LPPSRD <b>K</b> LTKNQVSLTCLVKGFYPSDIAVEWE<br>SNGQPENNYKTTTPVLDSDGSFFLYS <b>R</b> LTVDK<br>SRWQQGNVFSCSVMHEALHNHYTQKSLSLSPG<br>K    |
|                       | Pertuzumab-Light Chain | Q123D, N136D               | DIQMTQSPSSLSASVGRVTITCKASQDVSIG<br>VAWYQQKPGKAPKLLIYSASYRTGVPSRFSG<br>SGSGTDFTLTISSLPEDFATYYCQQYYIYPY<br>TFGQGTKVEIKGSVAAPSVFIFPPSDE <b>D</b> LKSG<br>TASVVCL <b>D</b> NFYPREAKVQWKVDNALQSGNSQ<br>ESVTEQDSKDYSLSSSTLTLSKADYEKHKVY<br>ACEVTHQGLSSPVTKSFNRGEC                                                                                                                                                                                                                                                                                                   |
|                       | DL11-Heavy Chain       | K152D, H173D, S188W, K370E | EVQLVESGGGLVQPGGSLRLSCAASGFTLSGD<br>WIHWVRQAPGKGLEWLGEISAAGGYTDYADSV<br>KGRFTISADTSKNTAYLQMNSLRAEDTAVYYC<br>ARESRVSFEAAMDYWGQTLVTVSSASTKGPS<br>VFPLAPSSKSTSGGTAALGCLV <b>D</b> DYFPEPVTV<br>SWNSGALTSGV <b>D</b> TFPVAVLQSSGLYSL <b>W</b> SVVTV<br>PSSSLGTQTYICNVNHKPSNTKVDKKEPKSC<br>DKTHTCPPCPAPELLGGPSVFLFPPKPKDTLM<br>ISRTPEVTCVVVDVSHEDPEVKFNWYVDGVEV<br>HNAKTKPREEQYNSTYRVVSVLTVLHQDWLNG<br>KEYKCKVSNKALPAPIEKTISKAKGQPREPQV<br>YTLPPSRDELTKNQVSLTCLV <b>E</b> GFYPSDIAVE<br>WESNGQPENNYKTTTPVLDSDGSFFLYSKLTV<br>DKSRWQQGNVFSCSVMHEALHNHYTQKSLSL<br>PGK |

## Structure-guided design of bispecific antibody

| Bispecific       | Chains                   | Mutations                  | Sequence                                                                                                                                                                                                                                                                                                                                                                                                                                                                                                                                                                        |
|------------------|--------------------------|----------------------------|---------------------------------------------------------------------------------------------------------------------------------------------------------------------------------------------------------------------------------------------------------------------------------------------------------------------------------------------------------------------------------------------------------------------------------------------------------------------------------------------------------------------------------------------------------------------------------|
|                  | DL11-Light Chain         | Q123K, N136K, T177A        | DIQMTQSPSSLSASVGRVTITCRASQDLATD<br>VAWYQQKPGKAPKLLIYSASFLYSGVPSRFSG<br>SGSGTDFTLTISSSLQPEDFATYYCQQSEPEPY<br>TFGQGTKVEIKGSVAAPSVFIFPPSDEK <del>L</del> KSG<br>TASVVCLL <del>K</del> NFYPREAKVQWKVDNALQSGNSQ<br>ESVTEQDSKDYSLSS <del>A</del> LTLSKADYEKHKVY<br>ACEVTHQGLSSPVTKSFNRGEC                                                                                                                                                                                                                                                                                             |
| Anti-CD20 X CD20 | Rituximab-Heavy Chain    | L133V, L150A, E357K, K409R | QVQLQQPGAELVKPGASVKMSCKASGYTFTSY<br>NMHWVKQTPGRGLEWIGAIYPGNGDTSYNQKF<br>KGKATLTADKSSSTAYMQLSSLTSEDSAVYYC<br>ARSTYYGGDWYFNVWGAGTTVTVSAASTKGPS<br>VFP <del>V</del> APSSKSTSGGTAALGC <del>A</del> VKDYFPEPVTV<br>SWNSGALTSGVHTFPAVLQSSGLYSLSSVTV<br>PSSSLGTQTYICNVNHKPSNTKVDKKVEPKSC<br>DKTHTCPPCPAPELLGGPSVFLFPPKPKDTLM<br>ISRTPEVTCVVVDVSHEDPEVKFNWYVDGVEV<br>HNAKTKPREEQYNSTYRVVSVLTVLHQDWLNG<br>KEYKCKVSNKALPAPIEKTISKAKGQPREPQV<br>YTLPPSRD <del>K</del> LTKNQVSLTCLVKGFYPSDIAVE<br>WESNGQPENNYKTTTPVLDSDGSFFLYSL <del>R</del> LTV<br>DKSRWQQGNVFCFSVMHEALHNHYTQKSLSLS<br>PGK |
|                  | Rituximab-Light Chain    | Q123D, N136D               | QIVLSQSPAILSASPGEKVTMTCRASSSVSYI<br>HWFQQKPGSSPKPIYATSNLASGVPVRFSGS<br>GSGTSYSLTISRVEAEDAATYYCQQWTSNPPT<br>FGGGTKLEIKGSVAAPSVFIFPPSDE <del>D</del> LKSGT<br>ASVVCLL <del>D</del> NFYPREAKVQWKVDNALQSGNSQ<br>SVTEQDSKDYSLSS <del>T</del> LTLSKADYEKHKVYA<br>CEVTHQGLSSPVTKSFNRGEC                                                                                                                                                                                                                                                                                                |
|                  | Obinutuzumab-Heavy Chain | K152D, H173D, S188W, K370E | QVQLVQSGAEVKKPGSSVKVSCASGYAFSYS<br>WINWVRQAPGQGLEWMGRIFPGDGD <del>T</del> DYNGKF<br>KGRVTITADKSTSTAYMELSSLRSED <del>T</del> AVYYC<br>ARNVFDGYWLVYWGQGLVTVSSASTKGPSVF<br>PLAPSSKSTSGGTAALGCLV <del>D</del> DYFPEPVTVSW<br>NSGALTSGV <del>D</del> TFAVLQSSGLYSL <del>W</del> SVVTVPS<br>SSLGTQTYICNVNHKPSNTKVDKKVEPKSCDK<br>THTCPPCPAPELLGGPSVFLFPPKPKDTLMIS<br>RTPEVTCVVVDVSHEDPEVKFNWYVDGVEVHN<br>AKTKPREEQYNSTYRVVSVLTVLHQDWLNGKE<br>YKCKVSNKALPAPIEKTISKAKGQPREPQVYT<br>LPPSRDELTKNQVSLTCLV <del>E</del> GFYPSDIAVEWE<br>SNGQPENNYKTTTPVLDSDGSFFLYSKLTV <del>D</del> K        |

## Structure-guided design of bispecific antibody

| Bispecific | Chains                       | Mutations              | Sequence                                                                                                                                                                                                                                                                    |
|------------|------------------------------|------------------------|-----------------------------------------------------------------------------------------------------------------------------------------------------------------------------------------------------------------------------------------------------------------------------|
|            |                              |                        | SRWQQGNVFSVCSVMHEALHNHYTQKSLSLSPG<br>K                                                                                                                                                                                                                                      |
|            | Obinutuzumab-<br>Light Chain | Q123K,<br>N136K, T177A | DIVMTQTPLSLPVTTPGEPASISCRSSKSLLS<br>NGITYLYWYLQKPGQSPQLLIYQMSNLVSGVP<br>DRFSGSGSGTDFTLKISRVEAEDVGVYYCAQN<br>LELPYTFGGGTKVEIKGSVAAPSVFIFPPSDE<br><b>K</b> LKSGTASVVCLL <b>K</b> NFYPREAKVQWKVDNALQ<br>SGNSQESVTEQDSKDYSLSS <b>A</b> LTLSKADYE<br>KHKVYACEVTHQGLSSPVTKSFNRGEC |



## Structure-guided design of bispecific antibody

Table S9. Summary of all possible molecular weights and observable percentage for each BsAb. All theoretical masses are calculated using Agilent MassHunter Sequence Manager B.09.00 (Agilent Technologies). All theoretical masses shown are C-terminal lysine clipping variants.

| Possible assemblies                                                                 | anti-EGFR/HER2 BsAb                 |                    |         | anti-CD20/CD20 BsAb                     |                    |         |
|-------------------------------------------------------------------------------------|-------------------------------------|--------------------|---------|-----------------------------------------|--------------------|---------|
|                                                                                     | Theoretical mass (Da)               | Observed mass (Da) | % Found | Theoretical mass (Da)                   | Observed mass (Da) | % Found |
|    | anti-EGFR monospecific<br>144370.66 | 144366.56          | 0.5     | anti-CD20 monospecific (1)<br>143936.45 | 143935.06          | 0.7     |
|    | 144433.98                           | ND                 | ND      | 144021.49                               | ND                 | ND      |
|    | 144497.24                           | ND                 | ND      | 144106.52                               | ND                 | ND      |
|    | 144535.81                           | ND                 | ND      | 145064.09                               | ND                 | ND      |
|   | BsAb<br>144599.10                   | 144597.05          | 84.8    | BsAb<br>145149.12                       | 145146.85          | 78.3    |
|  | 144599.10                           | ND                 | ND      | 145149.12                               | ND                 | ND      |
|  | 144662.39                           | ND                 | ND      | 145234.16                               | ND                 | ND      |
|  | 144700.96                           | 144705.24          | 1.4     | 146191.72                               | ND                 | ND      |
|  | 144764.25                           | 144759.92          | 13.3    | 146276.76                               | ND                 | ND      |
|  | anti-HER2 monospecific<br>144827.54 | 144824.95          | 0.1     | anti-CD20 monospecific (2)<br>146361.79 | 146359.23          | 21      |

ND = Not detected
